# Supplementary material
Source: publisher figshare collection journal article supplement (https://geolsoc.figshare.com/ndownloader/files/23204879)
Supplement: Supplementary file 1 [file 23204879]

**Supplementary Material**

The supplementary material includes 10 figures (Figs. S1-10) and 6 tables (Table S1-6).

**Table captions:**

**Table S1.** Crystal sizes and aspect ratios from 197 zircon grains for K-bentonites in Ordovician-Silurian transition across in nine sections in South China

**Table S2.** LA-ICP-SFMS zircon U-Pb isotopic and analysis of the K-bentonite samples B2, B14 and B18 in the Songmutang section of the Upper Yangtze region

**Table S3.** Zircon trace element data (in ppm) of the K-bentonite samples B2, B14 and B18 in the Songmutang section of the Upper Yangtze region

**Table S4.** Major element concentrations of K-bentonites in the Songmutang section of the Upper Yangtze region (wt%)

**Table S5.** Trace-element concentrations of K-bentonites in the Songmutang section of the Upper Yangtze region (ppm)

**Table S6.** Mineralogical and geochemical characteristics of K-bentonites from Songmutang section and global K-bentonites

**Figure captions:**

**Fig. S1.** Comparative X-ray diffraction patterns of Songmutang K-bentonites and those of South China elsewhere. Data source: YC0709 from [Hu *et al*. (2009)](#_ENREF_19); D006X2 from [Wang *et al*. (2015)](#_ENREF_56); PY1-V5 from [Ge *et al*. (2019)](#_ENREF_12).

**Fig. S2.** The relation of zircon crystal size and aspect ratio for K-bentonites from South China (A) and Th vs U concentrations of K-bentonite beds from Zhoujiaxi group in Songmutang section (B). Data source: Mayangzhai from [Luo *et al*. (2017b)](#_ENREF_37); Taoyuan from [Xie *et al.* (2012)](#_ENREF_64); Lunshan from [Yang *et al*. (2019)](#_ENREF_71); Anji from [Wang *et al*. (2015)](#_ENREF_56); Xinwen, Wuxing and Liangba from [Ge *et al*. (2019)](#_ENREF_12) ; Wangjiawan from [Hu *et al*. (2008)](#_ENREF_18).

**Fig. S3.** Comparison of chondrite-normalized REE diagrams for K-bentonite from O-S transition in South China with those of the worldwide elsewhere. The normalization values are from [Sun & McDonough (1989)](#_ENREF_51), Wangjiawan and Huanghuachang from [Hu *et al*. (2009)](#_ENREF_19); Yanzixiang and Liziping from [Xiong *et al*. (2019)](#_ENREF_66); Anji from [Wang *et al*. (2015)](#_ENREF_56); Mayangzhai from [Luo *et al*. (2017b)](#_ENREF_37); Lunshan from [Yang *et al*. (2019)](#_ENREF_71); Tianjiawan, Liangbai, Liangcun, Fenghuang and Wuxing date from [Ge *et al*. (2019)](#_ENREF_12); Subduction-related dacite from [Yi *et al*. (2014)](#_ENREF_74); Precordillera argentine from [Huff *et al*. (1998)](#_ENREF_23); Appalachian from [Bergström *et al*. (1998)](#_ENREF_6); Podolia from [Huff *et al*. (2000)](#_ENREF_21); Isles from [Huff *et al*. (1991)](#_ENREF_20).

**Fig. S4.** Comparison of primitive mantle-normalized multi-elemental patterns for K-bentonite from O-S transition in South China with those in the world elsewhere. The normalization values are from [Sun & McDonough (1989)](#_ENREF_51), Wangjiawan and Huanghuachang from [Hu *et al*. (2009)](#_ENREF_19); Yanzixiang and Liziping from [Xiong *et al*. (2019)](#_ENREF_66); Anji from [Wang *et al*. (2015)](#_ENREF_56); Mayangzhai from [Luo *et al*. (2017b)](#_ENREF_37); Lunshan from [Yang *et al*. (2019)](#_ENREF_71); Tianjiawan, Liangbai, Liangcun, Fenghuang and Wuxing from [Ge *et al*. (2019)](#_ENREF_12); Subduction-related dacite from [Yi *et al*. (2014)](#_ENREF_74); Precordillera argentine from [Huff *et al*. (1998)](#_ENREF_23); Appalachian from [Bergström *et al*. (1998)](#_ENREF_6); Podolia from [Huff *et al*. (2000)](#_ENREF_21); Isles from [Huff *et al*. (1991)](#_ENREF_20).

**Fig. S5.** Temporal-spatial distribution of volcanic events within the global scale during O-S transition from South China, North America, Norway, Sweden and Denmark. Isotopic geochronological dates obtained from K-bentonites in South China ([Hu *et al*. 2008](#_ENREF_18); [Xie *et al*. 2012](#_ENREF_64); [Luo *et al*. 2016](#_ENREF_37); [Xiong *et al*. 2017](#_ENREF_65); [Xiong *et al*. 2019](#_ENREF_66); [Yang et al., 2019](#_ENREF_71)); North America ([Tucker & McKerrow 1995](#_ENREF_53); [Min *et al*. 2001](#_ENREF_40); [Smith *et al*. 2011](#_ENREF_49); [Sell *et al*. 2013](#_ENREF_48)); Norway ([Sell *et al*. 2013](#_ENREF_48); [Svensen *et al*. 2015](#_ENREF_52); [Ballo *et al*. 2019](#_ENREF_4)), Sweden ([Tucker & McKerrow 1995](#_ENREF_53); [Min *et al*. 2001](#_ENREF_40); [Bergström *et al*. 2008](#_ENREF_7); [Bauert *et al*. 2014](#_ENREF_5)); Denmark ([Min *et al*. 2001](#_ENREF_40); [Sell *et al*. 2013](#_ENREF_48)); Estonia ([Sell *et al*. 2013](#_ENREF_48); [Bauert *et al*. 2014](#_ENREF_5)).

**Fig. S6.** Nb vs Y tectonic discriminant diagrams after [Pearce *et al*. (1984)](#_ENREF_42). (A) Comparison of K-bentonites from O-S transition in South China and Early Paleozoic granitoids in Qinling area; (B) Comparison of K-bentonites from O-S transition and Early Paleozoic granitoids in South China. Granitoids in Dabie from [Ma *et al*. (2004)](#_ENREF_38) and [Zhang *et al*. (2007)](#_ENREF_78); Granitoids in northern Qinling area from [Li *et al*. (2001)](#_ENREF_29); [Qin *et al*. (2015)](#_ENREF_45); [Wang *et al*. (2009)](#_ENREF_58); [Ren *et al*. (2008)](#_ENREF_47); [Wang *et* *al*. (2018)](#_ENREF_55); [Xu *et al*. (2018)](#_ENREF_68); [Yuan *et al*. (2017)](#_ENREF_76); [Yao *et al*. (2017)](#_ENREF_72); [Abdallsamed *et al*. (2017)](#_ENREF_1); Central Qinling from [Qin *et al*. (2014)](#_ENREF_44) and [Wang *et al*. (2017b)](#_ENREF_57); Eastern Qinling from [Li *et al*. (2019)](#_ENREF_28); Granitoids date in Tongbai from [Jiang *et al*. (2009)](#_ENREF_24); [Li *et al*. (2018)](#_ENREF_31); [Wang *et al*. (2017a)](#_ENREF_54). Granitoids date in eastern Guangxi from [Li *et al*. (2017)](#_ENREF_30); [Nong *et al*. (2017)](#_ENREF_41); [Zou *et al*. (2017)](#_ENREF_81); [Jiang *et al*. (2017)](#_ENREF_25); northeastern Guangxi from [Bai *et al*. (2015)](#_ENREF_3); [Cheng *et al.* (2016)](#_ENREF_11); [Chen *et al*. (2012)](#_ENREF_8); Wugongshan from [Zhong *et al*. (2016)](#_ENREF_79); [Lou *et al*. (2002)](#_ENREF_34); [Wu & Zhang (2003)](#_ENREF_61); [Xu *et al*. (2006)](#_ENREF_67); [Cheng *et al*. (2009)](#_ENREF_10); Yunkai area from [Peng *et al*. (2006)](#_ENREF_43); [Yu *et al*. (2018)](#_ENREF_75); [Yan *et al*. (2017)](#_ENREF_69); Wuyi area from [Liu *et al*. (2008)](#_ENREF_33); [Zeng *et al*. (2008)](#_ENREF_77); [Xia *et al*. (2014)](#_ENREF_62); [Wang *et al*. (2011)](#_ENREF_59); Southern Jiangxi-Northern Guangdong from [Meng *et al*. (2016)](#_ENREF_39); [Qin *et al*. (2018)](#_ENREF_46); [Luo *et al*. (2017a)](#_ENREF_35); K-bentonite from [Hu *et* *al*. (2009)](#_ENREF_19); [Su *et al*. (2009)](#_ENREF_50); [Yi *et al*. (2014)](#_ENREF_74); [Xiong *et al*. (2019)](#_ENREF_66); [Luo *et al*. (2017b)](#_ENREF_37). ORG, ocean ridge granites, VAG, volcanic arc granites, WPG, within-plate granites, Syn-COLG, syn-collision granites.

**Fig. S7.** The tectonic-lithofacies paleogeographic map show the development of a diachronous and progressive clastic wedge from the southeastern to the northwestern foreland basin in Central Hunan Province during Late Ordovician to Early Silurian (modified from [Xiao *et al*. 2017)](#_ENREF_63). (A) Tianmashan Fm, 5-10 cm thick sandstones display Ta-Tc-Td members of Bouma sequence in Daoxian area；(B) Tianmashan Fm, exhibits Bouma Tc and Td divisions in Daoxian area; (C) Zhoujiaxi Gp, thin-bedded facies of sandstones with Bouma Tc-Td-Te members; (D) Zhoujiaxi Gp, thin-bedded facies of siltstone shows are composed of amalgamated Td and Te division; (E) Xiaoheba Fm, the littoral-neritic facies of sandstone; (F) Huixingsao Fm, greyish green siltstones intercalated with mudstones; (G) Rongxi Fm, purple siltstone with mudstone intercalation; (H) Xiushan Fm, alternating sandstone and mudstone.

**Fig. S8.** Representative field photographs of unconformity interface in Central Hunan Province. (I) Unconformity between the Tianmashan and Tiaomajian Fm in Yongzhou area; (J) Unconformity between the Tianmashan and Tiaomajian Fm in Jiangyong area; (K) Unconformity between the Zhoujixi Gp and Tiaomajian Fm in Xinhua area; (L) Unconformity between the Zhoujixi Gp and Tiaomajian Fm in Dongkou area. The position of unconformity in Fig. S7 are included.

**Fig. S9.** Regional correlation of Late Ordovician to Early Silurian stratum from SE Cathaysia to the Yangtze region through Xuefeng mountain, South China. Orange areas denote sequence missing; dark and grey, black shales; yellow zones, K-bentonite beds; red zones, shallow marine red beds. Chronostratigraphic subdivision after International Commission on Stratigraphy 2018 (ICS); strata division and contrast mainly after [Chen *et al*. (2014)](#_ENREF_9) and [Su *et al*. (2009)](#_ENREF_50); K-bentonites chronological data from [Ge *et al*. (2019)](#_ENREF_12); [Hu *et al*. (2008)](#_ENREF_18) and this study.

**Fig. S10.** Simpliﬁed geological map of South China Sea and adjacent regions showing the possible Nanhai blocks with Precambrian basement. Some major faults and the location of blocks are modified after [Ye *et al*. (2018)](#_ENREF_73); [Yang *et al*. (2017)](#_ENREF_70); [Guo *et al*. (2016)](#_ENREF_14). The distribution of well and trawl from [Liu *et al*. (2012)](#_ENREF_32) and [Zhu *et al*. (2017)](#_ENREF_80).

**Fig. S1**


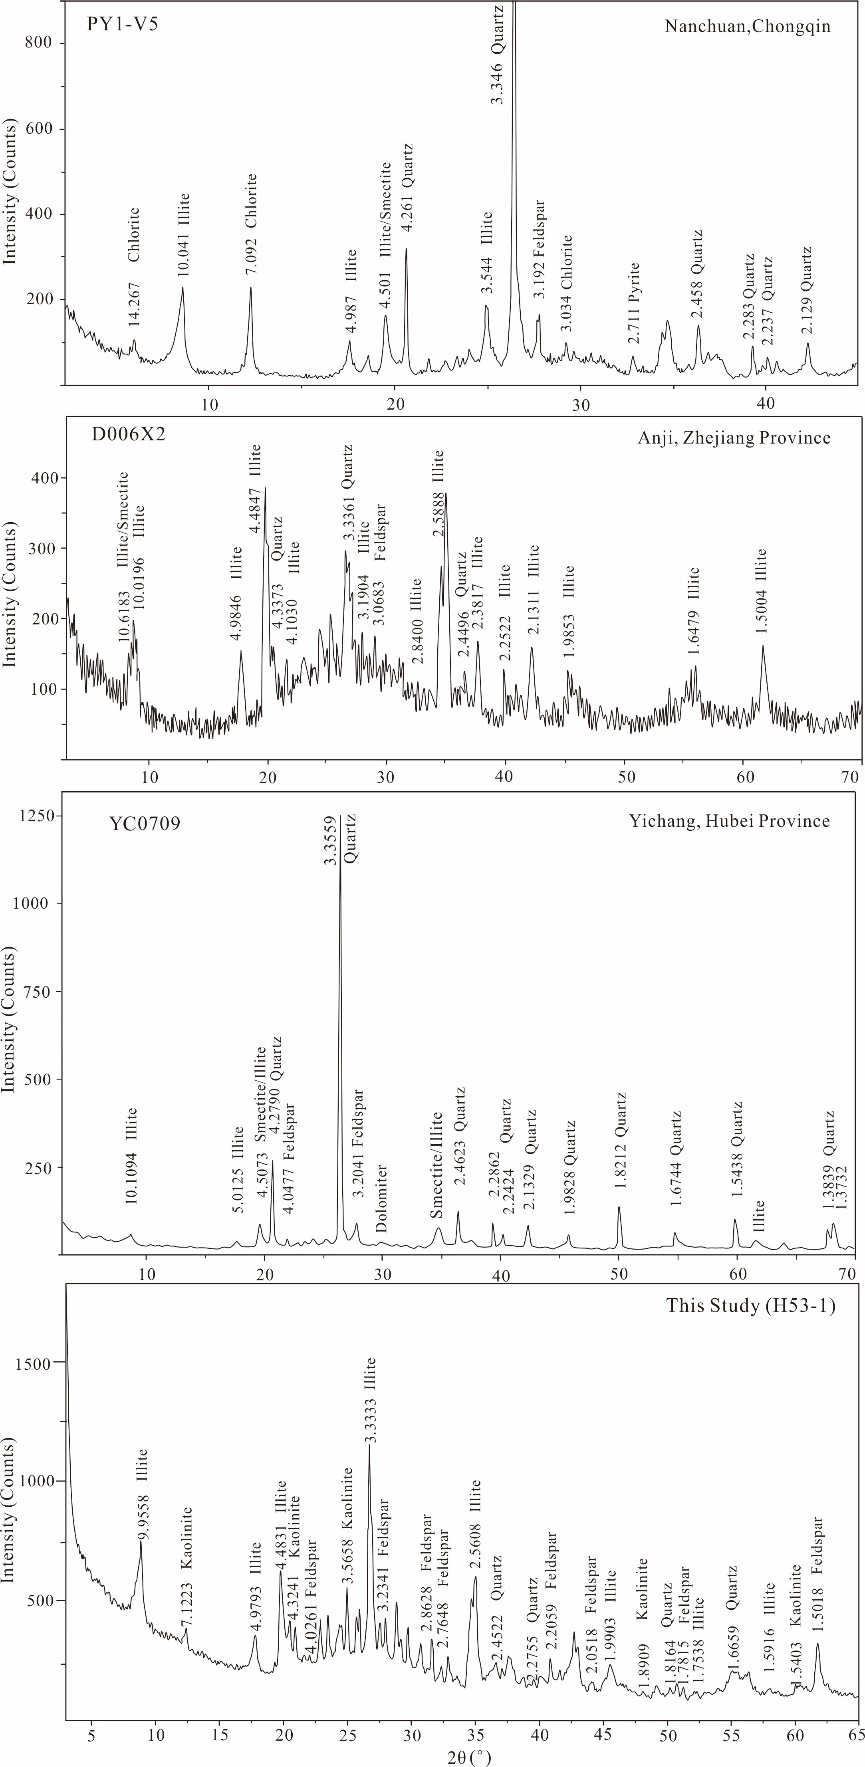


**Fig. S2**


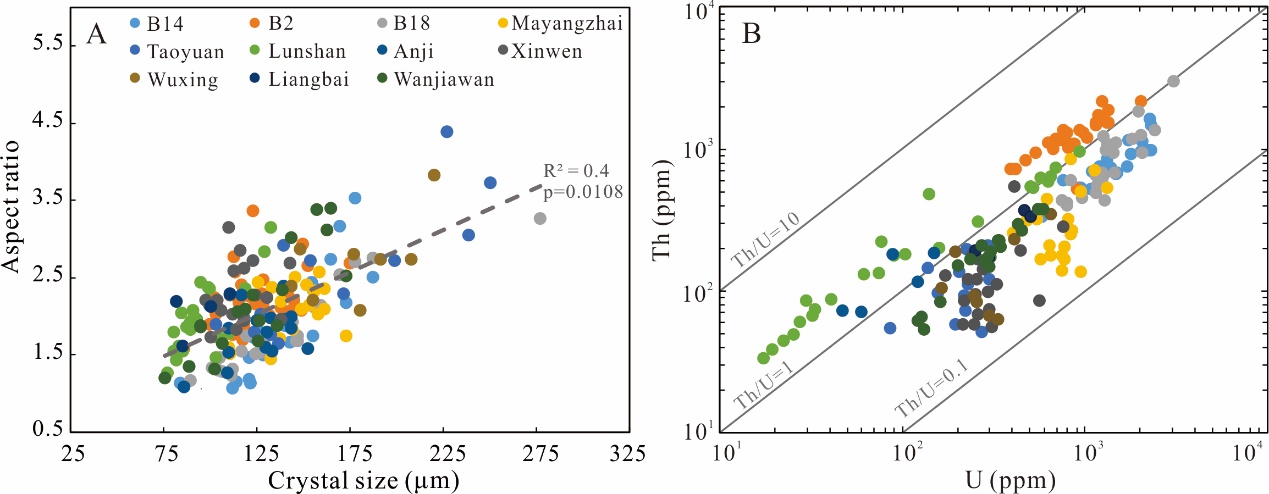


**Fig. S3**


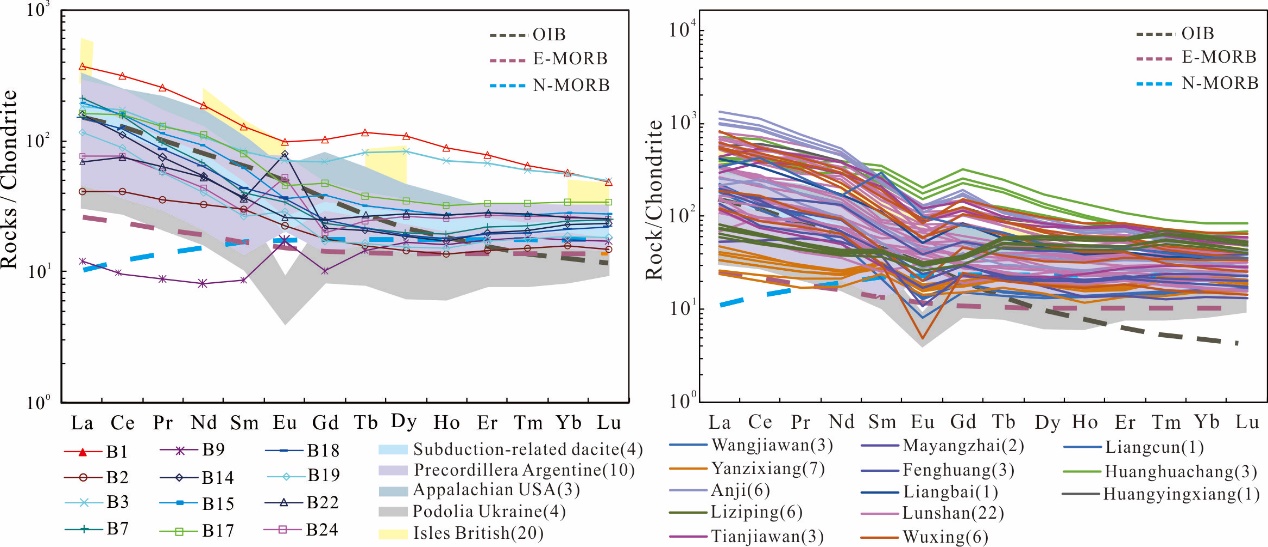


**Fig. S4**


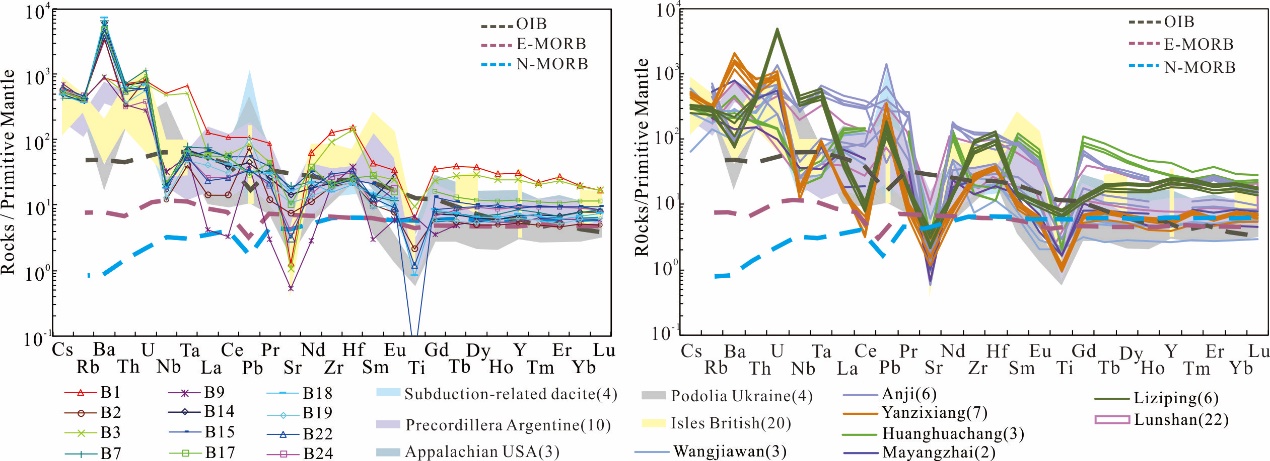


**Fig. S5**


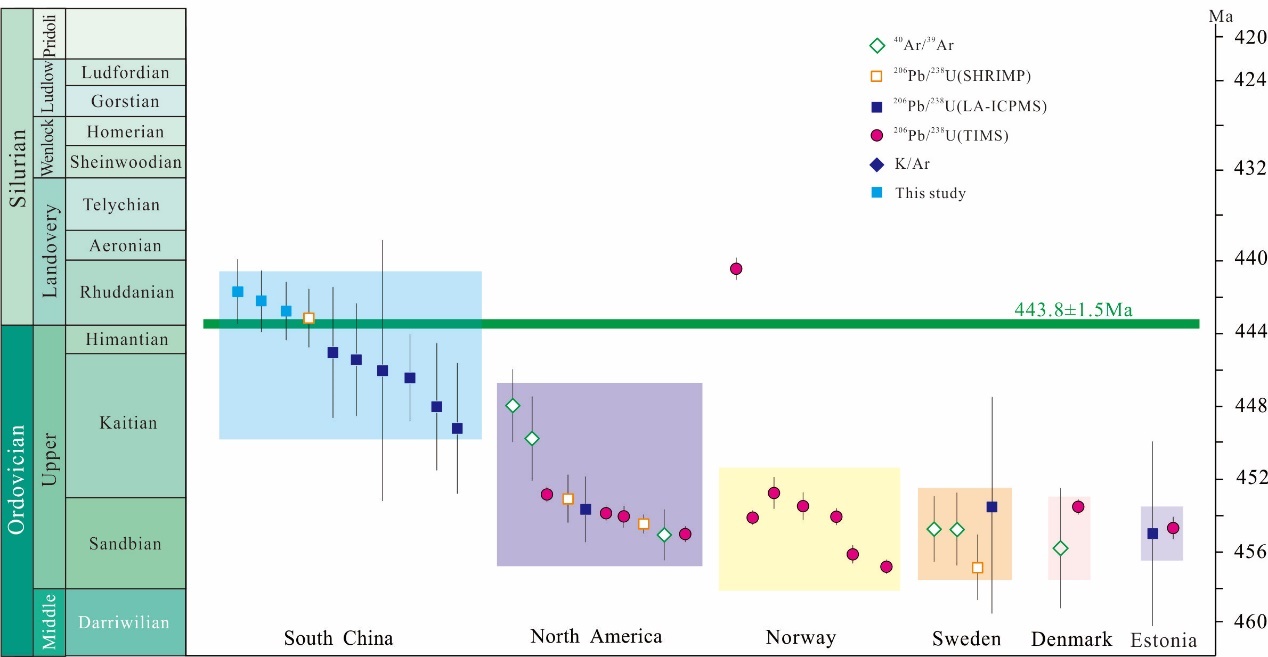


**Fig. S6**


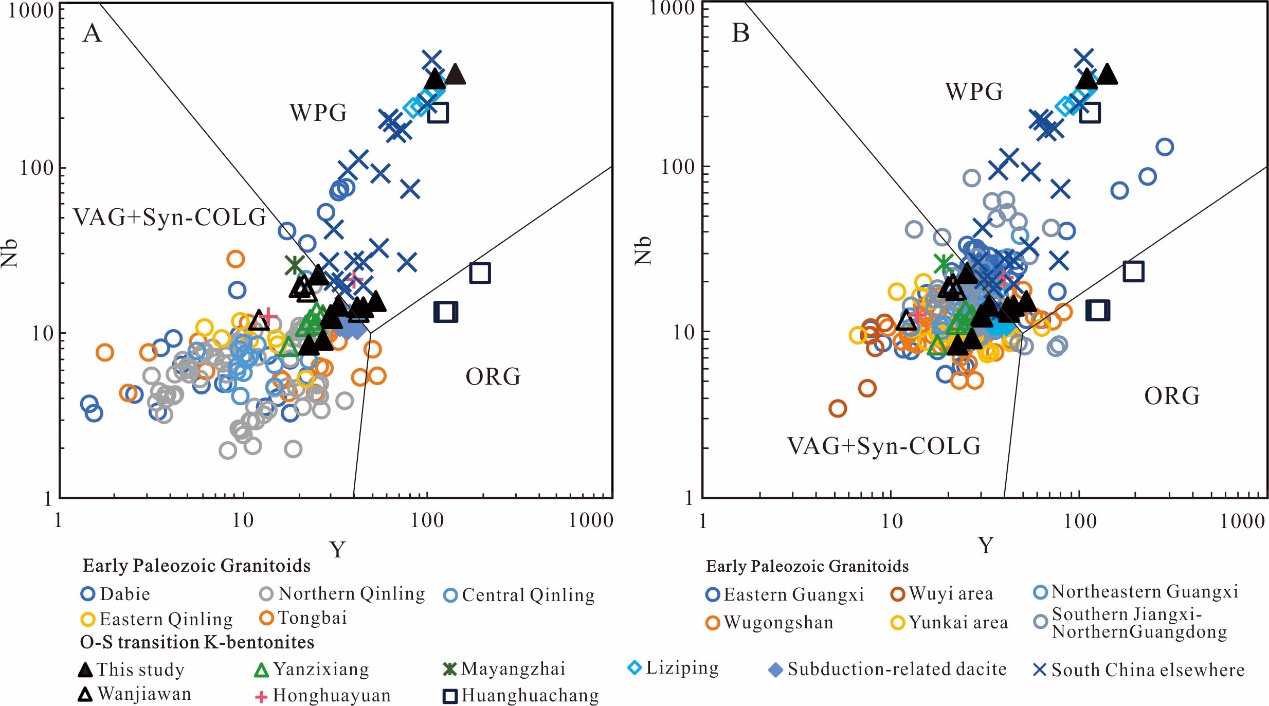


**Fig. S7**


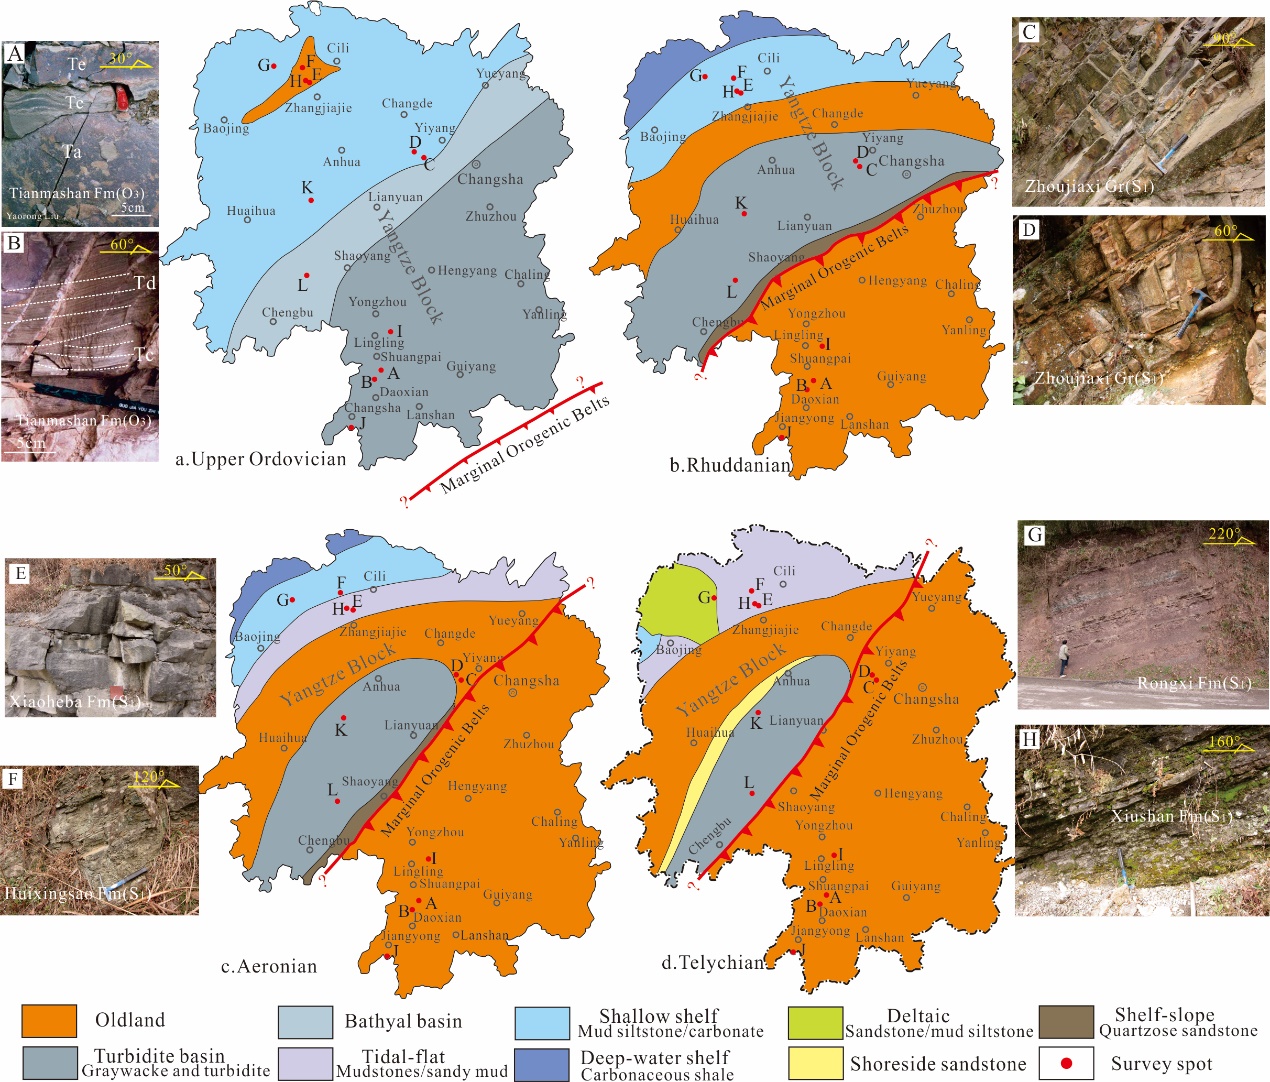


**Fig. S8**


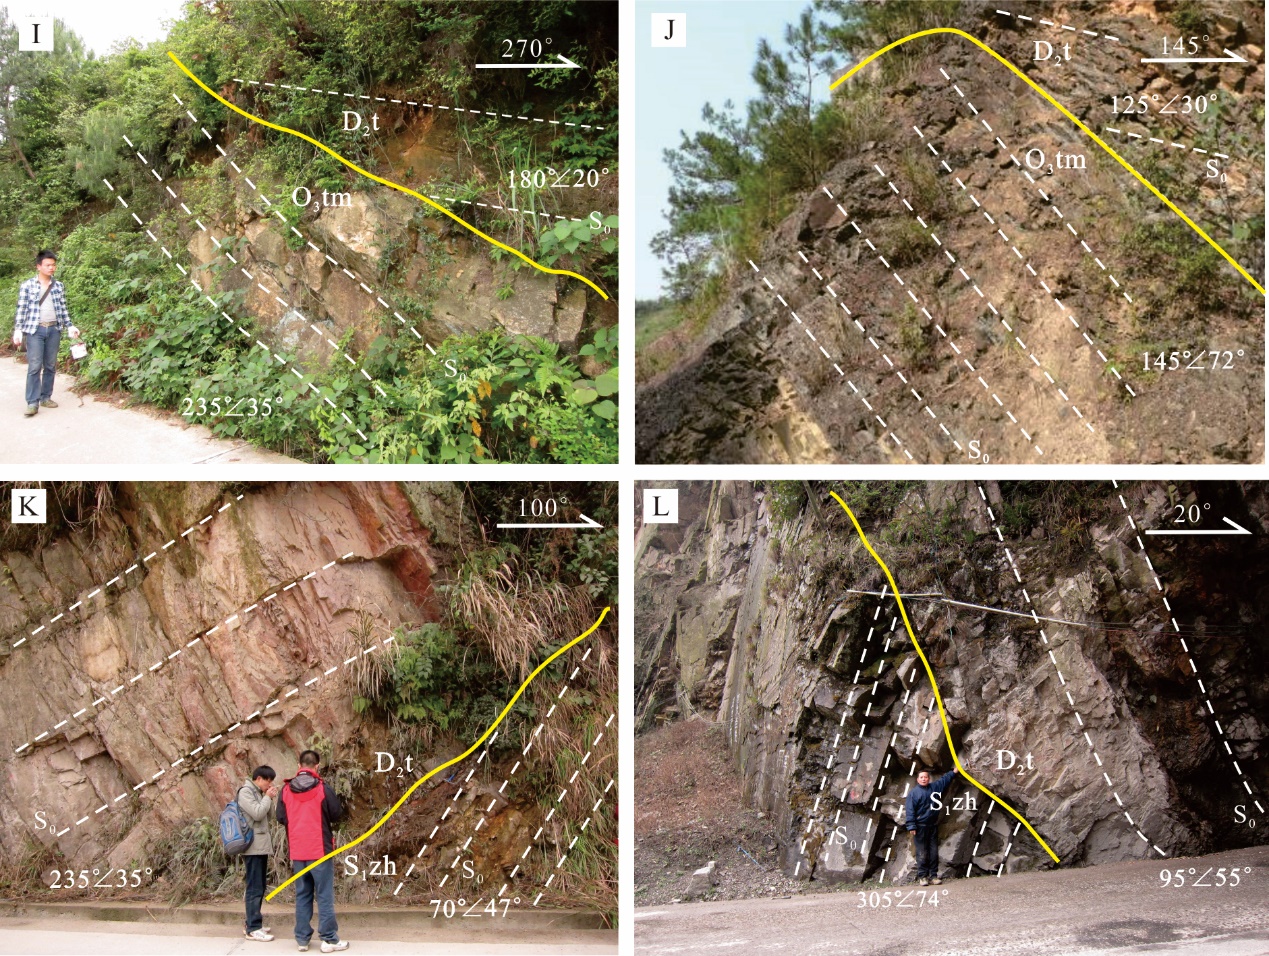


**Fig. S9**

.
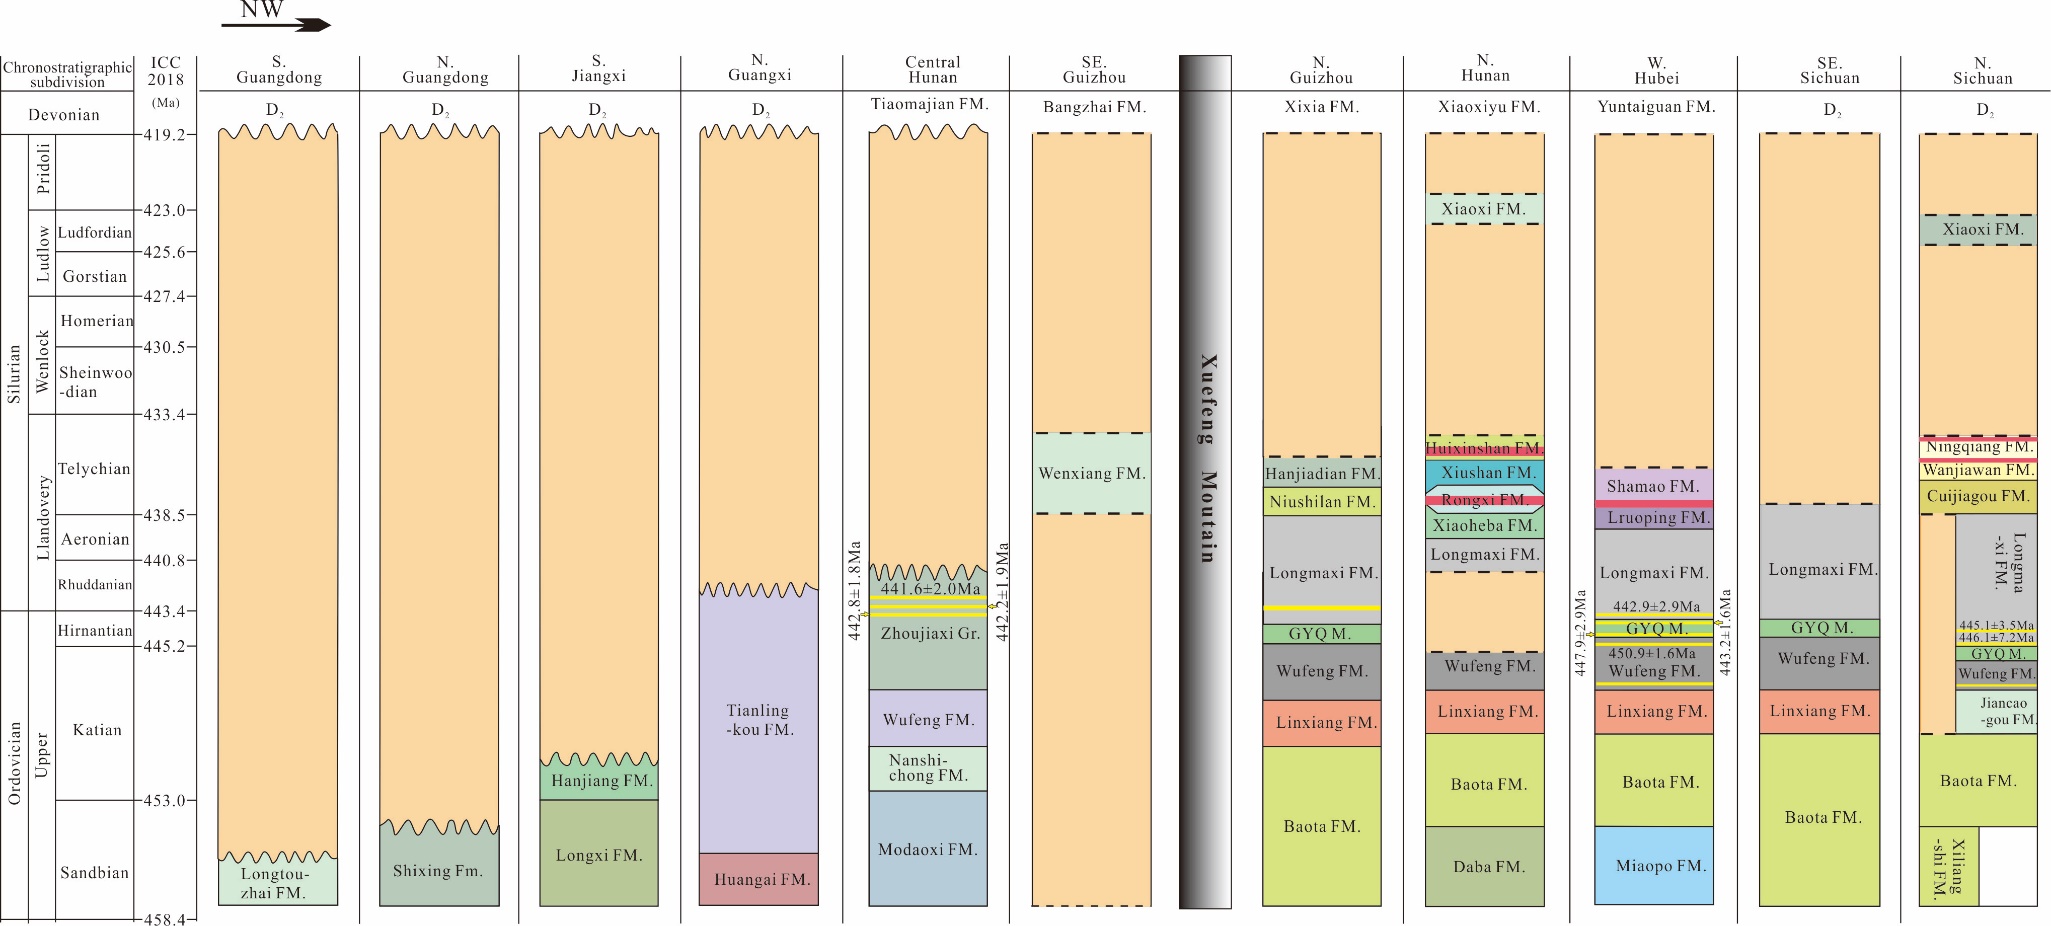


**Fig. S10**


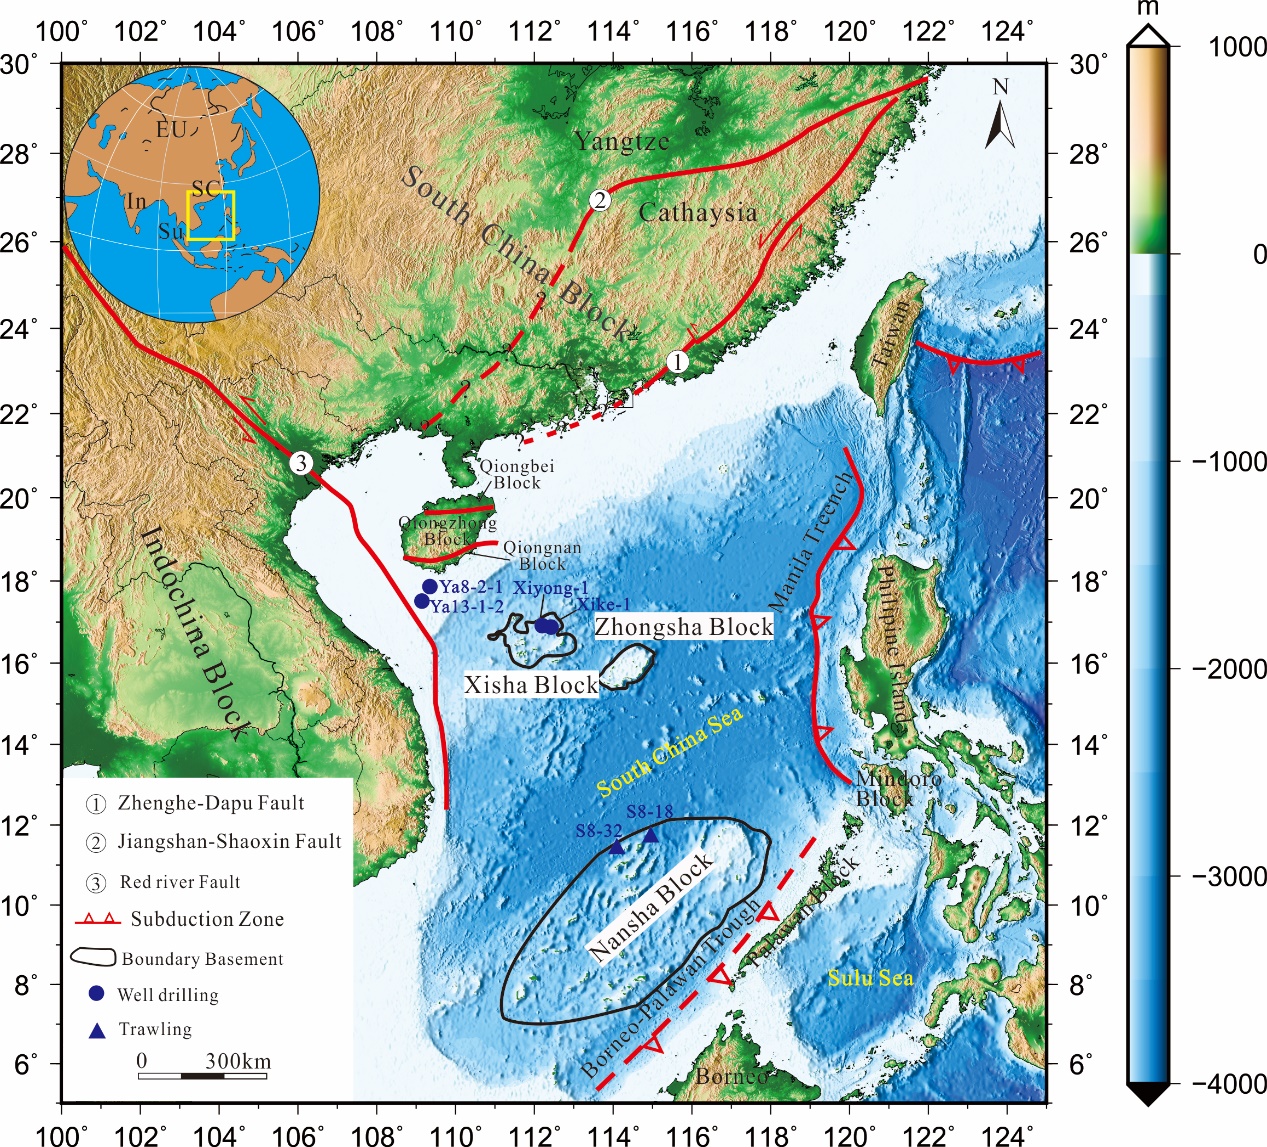


**References**

Abdallsamed, M.I.M., Wu, Y.B., Zhang, W., Zhou, G., Wang, H., Yang, S., 2017. Early Paleozoic high-Mg granodiorite from the Erlangping unit, North Qinling orogen, central China: Partial melting of metasomatic mantle during the initial back-arc opening. *Lithos*, **288**–**289**, 282–294, https://doi.org/ 10.1016/j.lithos.2017.07.016

Bai, D., Zhong, X., Pengyuan, J., Xiong, X., Wenyi, H., 2015. The zircon SHRIMP U–Pb dating, geochemical characteristics and tectonic setting of Caledonian Yuechengling pluton in the western segment of the Nanling Mountains. *Cheochimica*, **44**, 27–42 [in Chinese with English abstract].

Ballo, E.G., Augland, L.E., Hammer, Ø., Svensen, H.H., 2019. A new age model for the Ordovician (Sandbian) K-bentonites in Oslo, Norway. *Palaeogeography, Palaeoclimatology, Palaeoecology,* **520**, 203–213, https://doi.org/10.10 16/j.palaeo.2019.01.016

Bauert, H., Isozaki, Y., Holmer, L.E., Aoki, K., Sakata, S., Hirata, T., 2014. New U–Pb zircon ages of the Sandbian (Upper Ordovician) "Big K-bentonite" in Baltoscandia (Estonia and Sweden) by LA-ICPMS. *GFF,* **136**, 30–33, https://doi.org/ 10.1080/11035897.2013.862854

Bergström, S., Huff, W., Kolata, D., 1998. Early Silurian (Llandoverian) K-bentonites discovered in the southern Appalachian thrust belts, eastern USA: Stratigraphy, geochemistry, and tectonomagmatic and paleogeographic implications. *GFF*, **120**, 149–158, https://doi.org/10.1080/11035899801202149

Bergström, S., Toprak, F.Ö., Huff, W., Mundil, R., 2008. Implications of a new, biostratigraphically well-controlled, radio-isotopic age for the lower Telychian Stage of the Llandovery Series (Lower Silurian, Sweden). *Episodes*, **31**, 309–314, https://doi.org/10.18814/epiiugs/2008/v31i3/004

Chen, S., Fu, J., Chen, X., Ma, L., Lu, Y., 2012. Zircon SHRIMP U–Pb dating and geochemical characteristics of Haiyangshan monzogranitic batholith, northeast Guangxi. *Geology and Mineral Resources of South China*, **28**, 132–140 [in Chinese with English abstract].

Chen, X., Fan, J.X., Chen, Q., Tang, L., Hou, X.D., 2014. Toward a stepwise Kwangsian Orogeny. *Science China Earth Sciences*, **57**, 379–387.

Cheng, S., Jianming, F.U., Deming, X.U., Liyan, M.A., Pang, Y., Cao, L., 2009. Geochemical characteristics and petrogenensis of Xuehuading granitic batholith and its enclaves,South China. *Geotectonica Et Metallogenia*, **33**, 588–597 [in Chinese with English abstract].

Cheng, S., Jianming, F.U., Liyan, M.A., Youyue, L.U., Kou, X., Zhang, L., Huang, H., 2016. Origin of the Yuechengling Caledonian granitic batholith, northeastern Guangxi: constraint from zircon U–Pb geochronology, geochemistry and Nd-Hf isotopes. *Geotectonica Et Metallogenia*, **40**, 853–872 [in Chinese with English abstract].

Ge, X.Y., Mou, C.L., Wang, C.S., Men, X., Chen, C., Hou, Q., 2019. Mineralogical and geochemical characteristics of K-bentonites from the Late Ordovician to the Early Silurian in South China and their geological significance. *Geological Journal*, **54**, 514–528, https://doi.org/10.1002/gj.3201

Guo, X.R., Zhao, M.H., Huang, H.B., Qiu, X.L., Wang, J., He, E.Y., Zhang, J.Z., 2016. Crustal structure of Xisha Block and its tectonic attributes. *Chinese Journal of Geophysics*, **59**, 288–300 [in Chinese with English abstract].

Hu, Y.H., Zhou, J.B., Song, B., Wei, L., Sun, W.D., 2008. SHRIMP zircon U–Pb dating from K-bentonite in the top of Ordovician of Wangjiawan section, Yichang, Hubei, China. *Science in China*, **51**, 493–498.

Hu, Y.H., Sun, W.D., Ding, X., Wang, F., Ling, M., LIU, J., 2009. Volcanic event at the Ordovician-Silurian Boundary: The message from K-bentonite of Yangtze Block. *Acta Ptrologica Sinica*, **25**, 3298–3308 [in Chinese with English abstract].

Huff, W., Anderson, T., Rundle, C., Odin, G., 1991. Chemostratigraphy, K–Ar ages and illitization of Silurian K-bentonites from the Central Belt of the Southern Uplands-Down-Longford terrane, British Isles. *Journal of the Geological Society, London*, **148**, 861–868, https://doi.org/10.1144/gsjgs. 148.5.0861

Huff, W., Bergstrom, S., Kolata, D., 2000. Silurian K-bentonites of the Dnestr Basin, Podolia, Ukraine. *Journal of the Geological Society, London*, **157**, 493–504, https://doi.org/10.1144/jgs.157.2.493

Huff, W.D., Bergström, S.M., Kolata, D.R., Sun, H., 1997. The Lower Silurian Osmundsberg K-bentonite. Part II: Mineralogy, geochemistry, chemostratigraphy and tectonomagmatic significance. *Geological Magazine*, **135**, 15–26, https://doi.org/10.1017/s0016756897007887

Huff, W.D., Bergstrom, S.M., Kolata, D.R., Cingolani, C.A., Astini, R.A., 1998. Ordovician K-bentonites in the Argentine Precordillera of Argentina: relations to Gondwana margin evolution. *Journal of the Geological Society, London*, **142**, 107–126, https://doi.org/10.1144/gsl.sp.1998.142.01.06

Jiang, S., Nie, F., Fang, D., Liu, Y., 2009. Geochronology and geochemical features of the main intrusive rocks in the Weishancheng area , Tongbai County , Henan. *Acta Geologica Sinica*, **83**, 1011–1029 [in Chinese with English abstract].

Jiang, X., Kang, Z., Xu, J., Feng, Z., Pang, C., Fang, G., Wu, J., Xiong, S., 2017. Early paleozoic granodioritic plutons in the Shedong W–Mo ore district, Guangxi, southern China: Products of re-melting of middle Proterozoic crust due to magma underplating. *Journal of Asian Earth Sciences*, **141**, 59–73, https://doi.org/10.1016/j.jseaes.2016.11.004

Li, K., Fang, H., Guo, J., Liu, K., Wang, X., 2019. Petrogeochemistry, zircon U-Pb dating and geological significance of two-mica granites from Wuduoshan granite in Nanzhao county, eastern Qinling Mountains. *Earth Science—Journal of China University of geosciences*, **44**, 123–134 [in Chinese with English abstract].

Li, W., Wang, T., Wang, X., 2001. Source of Huichizi granitoid complex pluton in northern Qinling, Central China: constrained in element and isotopic geochemistry. *Earth Science Journal of China —University of Geosciences*, **26**, 269–278 [in Chinese with English abstract].

Li, X., Yu, Y., Wang, C., 2017. Caledonian granitoids in the Jinxiu area, Guangxi, South China: Implications for their tectonic setting. *Lithos*, **272–273**, 249–260, https://doi.org/10.1016/j.lithos.2016. 12.016

Li, Y., Zhang, P., He, X., Zhang, S., 2018. Zircon U–Pb Dating, geochemical characteristics of the gneissic granite from North Qinling terrain in Tongbai area and their geological significance. *Northwestern Geology*, **51**, 82–96 [in Chinese with English abstract].

Liu, B., Wu, S., Long, G., Guo, X., 2012. Basement characteristics and tectonic evolution in Qiongdongnan basin. *Precess in geophys*, **27**, 1465–1475 [in Chinese with English abstract].

Liu, R., Zhang, L., Zhou, H., Zhong, Z., Zeng, W., Xiang, H., Jin, S., Lu, X., Li, C., 2008. Petrogenesis of the Caledonian migmatites and related granites in northwestern Fujian Province, South China: syn-deformational crustal anaexis. *Acta Geologica Sinica*, **24**, 1205–1222 [in Chinese with English abstract].

Lou, F., Shu, L., Yu, J., Wang, D., 2002. Petrological and geochemical characteristics and origin of the Wugongshan dome granite, Jiangxi Province. *Geological Review*, **48**, 80–88 [in Chinese with English abstract].

Luo, C., Liu, G., Zuo, Z., 2017a. LA-ICP-MS Zircon U-Pb ages and geochemical characteristics of the Pingshi granitic pluton in southern Jiangxi and their tectonic significance. *East China Geology*, **37**, 79–88 [in Chinese with English abstract].

Luo, H., He, R., Pan, l., Yang, C., Yu, G., 2016. LA-ICP-MS Zircon U-Pb age and its significance of late Ordovician-early Silurian Longmaxi Bentonites. *Resources Environment ＆ Engineering*, **30**, 547–550 [in Chinese with English abstract].

Luo, H., Pan, L.K., He, R.L., 2017b. Geochemical characteristics and geological significance of Longmaxi Formation of late Ordovician-early Silurian in Mayangzhai area，Hubei Province. *Resources Environment ＆ Engineering*, **31**, 1–12 [in Chinese with English abstract].

Ma, C., Ming, H., Yang, K., 2004. An Ordovician magmatic arc at the northern foot of Dabie mountains: Evidence from geochronology and geochemistry of intrusive rocks. *Acta Petrologica Sinica*, **20**, 393–402 [in Chinese with English abstract].

Meng, L., Zhang, Z., Wu, Y., Liu, J., Shao, F., Hua, J., Chen, R., 2016. The geochemistry features and petrogenesis of Dabu Caledonian granite in southern Jiangxi Province. *Uranium Geology*, **32**, 13–22 [in Chinese with English abstract].

Min, K., Renne, P.R., Huff, W.D., 2001. 40Ar/39Ar dating of Ordovician K-bentonites in Laurentia and Baltoscandia. *Earth and Planetary Science Letters*, **185**, 121–134, http://doi.org/10.1016/ S0012-821X(00)00365-4

Nong, J., Zou, Y., Qiu, E., Guo, S., Ye, X., Xiang, F., Wen, M., Lu, S., 2017. Petrogenesis of Dacun and Gulong plutons in southeast Guangxi: Constraints from geochemistry, zircon U–Pb ages and Hf isotope. *Geological Bulletin of China*, **36**, 224–237 [in Chinese with English abstract].

Pearce, J.A., Harris, N.B.W., Tindle, A.G., 1984. Trace element discrimination diagrams for the tectonic interpretation of Granitic rocks. *Journal of Petrology*, **25**, 956–983, https://doi.org/10.1093/ petrology/25.4.956

Peng, S., Jin, Z., Liu, Y., Fu, J., He, L., Cai, M., Wang, Y., 2006. Petrochemistry, chronology and tectonic setting of strong peraluminous anatectic granitoids in Yunkai Orogenic Belt, western Guangdong Province, China. *Journal of China University of Geosciences*, **17**, 1–12 [in Chinese with English abstract].

Qin, Z.W., Wu, Y.B., Wang, H., Gao, S., Zhu, L.Q., Zhou, L., Yang, S.H., 2014. Geochronology, geochemistry, and isotope compositions of Piaochi S-type granitic intrusion in the Qinling orogen, central China: petrogenesis and tectonic significance. *Lithos*, **202**–**203**, 347–362, http://doi.org/10.1016/j.lithos.2014.06.006

Qin, Z., Wu, Y., Siebel, W., Shan, G., Hao, W., Abdallsamed, M.I.M., Zhang, W., Yang, S., 2015. Genesis of adakitic granitoids by partial melting of thickened lower crust and its implications for early crustal growth: A case study from the Huichizi pluton, Qinling orogen, central China. *Lithos*, **238**, 1–12, http://doi.org/10.1016/j.lithos.2015.09.017

Qin, Z., Fu, J., Lu, Y., Ma, L., Cheng, S., 2018. Petrogenesis and geological significance of the early Paleozoic Huashan pluton in northern Guangdong Huashan pluton in northern Guangdong. *Geological Science and Technology Information*, **37**, 1–12 [in Chinese with English abstract].

Ren, Q., Chen, J., Wang, Z., Yan, Z., Wang, T., 2008. Zircon U-Pb and geochemical analyses for leucocratic intrusive rocks in pillow lavas in the Danfeng Group, north Qinling Mountains, China. *Science in China*, **51**, 249–262.

Sell, B., Ainsaar, L., Leslie, S., 2013. Precise timing of the Late Ordovician (Sandbian) supereruptions and associated environmental, biological, and climatological events. *Journal of the Geological Society, London*, **170**, 711–714, https://doi.org/10.1144/jgs2012-148

Smith, M., Singer, B., Simo, T., 2011. A time like our own? Radioisotopic calibration of the Ordovician greenhouse to icehouse transition. *Earth and Planetary Science Letters*, **311**, 634–374, https://doi.org/ 10.1016/j.epsl.2011.09.014

Su, W.B., Huff, W.D., Ettensohn, F.R., Liu, X.M., Zhang, J.E., Li, Z.M., 2009. K-bentonite, black-shale and flysch successions at the Ordovician–Silurian transition, South China: Possible sedimentary responses to the accretion of Cathaysia to the Yangtze Block and its implications for the evolution of Gondwana. *Gondwana Research*, **15**, 111–130, https://doi.org/10.1016/j.gr.2008.06.004

Sun, W., McDonough, W., 1989. Chemical and isotopic systematics of oceanic basalts: Implications for mantle composition and processes. *Geological Society of London Special Publications*, **42**, 313–345, http://dx.doi.org /10.1144/GSL.SP.1989.042.01.19

Svensen, H.H., Hammer, Ø., Corfu, F., 2015. Astronomically forced cyclicity in the upper Ordovician and U–Pb ages of interlayered tephra, Oslo Region, Norway. *Palaeogeography, Palaeoclimatology, Palaeoecology*, **418**, 150–159, https://doi.org/10.1016/j.palaeo.2014.11.001

Tucker, R.D., McKerrow, W., 1995. Early Paleozoic chronology: A review in light of new U–Pb zircon ages from Newfoundland and Britain. *Canadian Journal of Earth Sciences*, **32**, 368-379, https://doi.org/10.1139/e95-032

Wang, H., Wu, Y.B., Yang, J.H., Qin, Z.W., Duan, R.C., Zhou, L., Yang, S.H., 2017a. Crustal basement controls granitoid magmatism, and implications for generation of continental crust in subduction zones: A Sr–Nd–Hf–O isotopic study from the Paleozoic Tongbai orogen, central China. *Lithos*, **282-283**, 298–315, https://doi.org/10.1016/j.lithos. 2017.03.014

Wang, J., Qin, J., Hu, P., Zhang, L., Zhao, Y., Zhang, Z., 2018. Zircon U-Pb ages and geochemical characteristics of the two-stage granitic magamtism from the Kuanping pluton in the northern Qinling Mountains: petrogenesis and tectonic Implication. *Geological Review*, **64**, 127–140 [in Chinese with English abstract].

Wang, L.W., Zhao, J.F., Chen, J.H., Zhang, Y.D., Chen, X.Y., Zhu, C.H., LIU, J., Hu, Y.H., Ma, X., 2015. Characterristics of Ktian (Late Ordovician) K-bentonites from Anji, Zhejiang Province. *Journal of Stratigraphy*, **39**, 155–168 [in Chinese with English abstract].

Wang, R., Xu, Z., Santosh, M., Liang, F., Fu, X., 2017b. Petrogenesis and tectonic implications of the early Paleozoic intermediate and mafic intrusions in the South Qinling Belt, Central China: Constraints from geochemistry, zircon U–Pb geochronology and Hf isotopes. *Tectonophysics*, **712**–**713**, 270–288, https://doi.org/10.1016/j.tecto.2017.05.021

Wang, T., Wang, X., Tian, W., Zhang, C., Li, W., 2009. North Qinling Paleozoic granite associations and their variation in space and time: Implications for orogenic processes in the orogens of central China. *Science in China*, **52**, 1359–1384.

Wang, Y.J., Zhang, A.M., Fan, W.M., Zhao, G.C., Zhang, G.W., Zhang, Y.z., Zhang, F.f., Li, S.Z., 2011. Kwangsian crustal anatexis within the eastern South China Block: Geochemical, zircon U–Pb geochronological and Hf isotopic fingerprints from the gneissoid granites of Wugong and Wuyi–Yunkai Domains. *Lithos*, **127**, 239–260, https://doi.org /10.1016 /j.lithos.2011.07.027

Watson, E., Wark, D., Thomas, J., 2006. Crystallization thermometers for zircon and rutile. *Contributions to Mineralogy and Petrology*, **151**, 413–433, https://doi.org/10.1007/s00410-006-0068-5

Wu, F., Zhang, F., 2003. Features and genesis of Caledonian granites in the Wugongshan in the eastern segment of the northern margin of South China plate. *Geology in China*, **30**, 166-172 [in Chinese with English abstract].

Xia, Y., Xu, X., Zou, H., Liu, L., 2014. Early Paleozoic crust–mantle interaction and lithosphere delamination in South China Block: Evidence from geochronology, geochemistry, and Sr–Nd–Hf isotopes of granites. *Lithos*, **184**–**187**, 416–435, https://doi.org/10.1016/j.lithos.2013.11.014

Xiao, P., Guo, J., Li, J., Wang, Z., Xikai, W., 2017. Sedimentary evolution and shale gas exploration potential of the Lower Silurian strata in Hunan. *Sedimentary Geology and Tethyan Geology*, **37**, 79–87 [in Chinese with English abstract].

Xie, S., Wang, Z., Wang, J., Jiewen, Z., 2012. LAICP-MS zircon U–Pb dating of the bentonites from the uppermost part of the Ordovician Wufeng Formation in the Haoping section, Taoyuan, Hunan. *Sedimentary Geology and Tethyan Geology*, **32**, 65–69 [in Chinese with English abstract].

Xiong, G., Wang, J., Li, Y., Yu, Q., Men, Y., Zhou, X., Xiaohui, X., Zhou, Y., Yang, X., 2017. Zircon U–Pb dating and geological significance of the bentonites from the upper Ordovician Wufeng Formation and lower Silurian Longmaxi Formation in western Daba Mountains. *Sedimentary Geology and Tethyan Geology*, **37**, 46–58 [in Chinese with English abstract].

Xiong, G.Q., Wang, J., Li, Y.Y., Yu, Q., Men, Y.P., Zhou, X.L., Xiong, X.H., Zhou, Y.X., Yang, X., 2019. Zircon U–Pb dating of K-bentonite from late Ordovician Wufeng Formation and earlier Silurian Longmaxi Formation in the eastern section of south Dbashan and its tectonic signification. *Acta Geologica Sinica*, **93**, 843–864 [in Chinese with English abstract].

Xu, D., Chen, G., Xia, B., Li, P., He, Z., 2006. The Caledonian adakite-Like granodiorites in Banshanpu area, eastern Hunan Province, South China: petrogenesis and geological significance. *Geological Journal of China Universities*, **12**, 507–521 [in Chinese with English abstract].

Xu, T., Guo, Q., Chen, Q., Wang, Q., Zhang, S., Zuo, W., Ren, C., 2018. Age and Geochemical features of the early Silurian Jiguanya highly fractionated Syn-collisional granites in the Baoji area of north Qinling Orogen and their geological significance. *Age and Geological Science and Technology Information*, **37**, 79–87 [in Chinese with English abstract].

Yan, C., Shu, L., Michel, F., Chen, Y., Li, C., 2017. Early Paleozoic intracontinental orogeny in the Yunkai domain, South China Block: New insights from field observations, zircon U–Pb geochronological and geochemical investigations. *Lithos*, **268**–**271**, 320–333, https://doi.org/10.1016/ j.lithos.2016.11.013

Yang, M., Zhang, H., Liao, Z., Luo, X., Lei, Z., Zhang, S., Zhang, Y., Li, Y., 2017. Tectonic evolution and hydrocarbon accumulation of the sedimentary Basins in Nansha Sea Waters (South China Sea). *Geotectonica Et Metallogenia*, **41**, 710–720 [in Chinese with English abstract].

Yang, S.C., Hu, W.X., Wang, X.L., Jiang, B.Y., Yao, S.P., Sun, F.N., Huang, Z.C., Zhu, F., 2019. Duration, evolution, and implications of volcanic activity across the Ordovician–Silurian transition in the Lower Yangtze region, South China. Earth and Planetary Science Letters, **518**, 13–25, http://doi.org /10.1016/j.epsl.2019.04.020

Yao, Z., Zhang, Y., Yang, T., Pengfei, Y.I., Zheng, S., 2017. Zircon U–Pb Geochronology, Petrogeochemistry of Huangniupu plutons in western section of the north Qinling Mountains and their geological significance. *Geoscience*, **31**, 1157–1169 [in Chinese with English abstract].

Ye, Q., Mei, L., Shi, H., Camanni, G., Shu, Y., Wu, J., Yu, L., Deng, P., Li, G., 2018. The Late Cretaceous tectonic evolution of the South China Sea area: An overview, and new perspectives from 3D seismic reflection data. *Earth-Science Reviews*, **187**, 186–204, http://doi.org /10.1016/j.earscirev. 2018.09.013

Yi, L.W., Ma, C.Q., Wang, L.X., Lai, Z.X., Li, X.Y., Yang, Y.N., Wu, F., Hu, Y.R., 2014. Discovery of late Ordovician subvolcanic rocks in South China existence of subduction-related dacite from early Paleozoic ? *Earth Science—Journal of China University of geosciences*, **39**, 637–653 [in Chinese with English abstract].

Yu, Y., Huang, X.L., Sun, M., He, P.L., 2018. Petrogenesis of granitoids and associated xenoliths in the early Paleozoic Baoxu and Enping plutons, South China: Implications for the evolution of the Wuyi-Yunkai intracontinental orogen. *Journal of Asian Earth Sciences*, **156**, 59–74, http://doi.org /10.1016/j.jseaes.2018.01.012

Yuan, F., Liu, J., Lu, G., Sha, Y., Zhang, S., Zhai, D., Wang, G., Zhang, H., Liu, G., Yang, S., Wang, J., Ren, W., 2017. Zircon U–Pb geochronology, geochemistry and petrogenesis of the granites and pegmatites from the Guangshigou uranium deposit in the northern Qinling Orogen, China. *Earth Science Frontiers*, **24**, 025–045 [in Chinese with English abstract].

Zeng, W., Li, Z., Zhou, H., Zhong, Z., Xiang, H., Liu, R., Jin, S., Lü, X., Li, C., 2008. Caledonian reworking of Paleoproterozoic basement in the Cathaysia Block: Constraints from zircon U–Pb dating, Hf isotopes and trace elements. *Chinese Science Bulletin*, **53**, 97–106.

Zhang, J., Ma, C., She, Z., Zhang, X., Zhou, H., 2007. The early Paleozoic Tiefosi syn-collisional granite in the northern Dabie Orogen: geochronological and geochemical constraints. *Science in China Series D-Earth Science*, **50**, 847–856.

Zhong, Y., Wang, L., Zhao, J., Liu, L., Ma, C., Zheng, J., Zhang, Z., Luo, B., 2016. Partial melting of an ancient sub-continental lithospheric mantle in the early Paleozoic intracontinental regime and its contribution to petrogenesis of the coeval peraluminous granites in South China. *Lithos*, **264**, 224–238, http://doi.org/10.1016/j.lithos.2016.08.026

Zhu, R., Liu, H., Yao, Y., Zhou, Y., Wang, Y., Li, Y., 2017. A preliminary analysis of Pre-Cenozoic tectonic deformation of Zhongsha-xisha Block in South China Sea. *Marine Geology & Quaternary Geology*, **37**, 67–74 [in Chinese with English abstract].

Zou, Y., Nong, J., Guo, S., Huang, X., Sun, M., Deng, B., 2017. Petrogenesis of the Shangmushui pluton in southeast Guangxi Province: constraints from petrochemistry, zircon U–Pb ages and Hf isotope. *Journal of Mineralogy and Petrology*, **37**, 52–62 [in Chinese with English abstract].
